# Supplementary material
Source: MDPI journal article supplement (https://www.mdpi.com/2311-7524/7/8/257)
Supplement: s1 [file s1]

# Season 2018

Plant height

| Source         | df | Type III SS | MS          | F         | P        |
|----------------|----|-------------|-------------|-----------|----------|
| Blocks         | 3  | 2.224090909 | 0.7413636   | 0.346309  | .7921 ns |
| Main Effects   |    |             |             |           |          |
| iinntttraction | 11 | 87.10424242 | 7.9185675   | 3.6989557 | .0049 ** |
| Error          | 21 | 44.95590909 | 2.1407576<- |           |          |
| Total          | 35 | 135.31      |             |           |          |
| Model          | 14 | 90.35409091 | 6.4538636   | 3.0147569 | .0110 *  |

No. of Crowns

| Source         | df | Type III SS | MS          | F         | P         |
|----------------|----|-------------|-------------|-----------|-----------|
| Blocks         | 3  | 0.377234848 | 0.1257449   | 1.7808916 | .1816 ns  |
| Main Effects   |    |             |             |           |           |
| iinntttraction | 11 | 7.448522727 | 0.6771384   | 9.5901276 | .0000 *** |
| Error          | 21 | 1.482765152 | 0.0706079<- |           |           |
| Total          | 35 | 9.32        |             |           |           |
| Model          | 14 | 7.837234848 | 0.5598025   | 7.9283306 | .0000 *** |

No. of leaves

| Source         | df | Type III SS | MS          | F         | P         |
|----------------|----|-------------|-------------|-----------|-----------|
| Blocks         | 3  | 8.862689394 | 2.9542298   | 2.9574251 | .0558 ns  |
| Main Effects   |    |             |             |           |           |
| iinntttraction | 11 | 165.2291288 | 15.02083    | 15.037077 | .0000 *** |
| Error          | 21 | 20.97731061 | 0.9989196<- |           |           |
| Total          | 35 | 193.9       |             |           |           |
| Model          | 14 | 172.9226894 | 12.351621   | 12.36498  | .0000 *** |

plant fresh weight

| Source         | df | Type III SS | MS          | F         | P         |
|----------------|----|-------------|-------------|-----------|-----------|
| Blocks         | 3  | 27.2917803  | 9.0972601   | 4.8038978 | .0106 *   |
| Main Effects   |    |             |             |           |           |
| iinntttraction | 11 | 1793.980038 | 163.08909   | 86.120802 | .0000 *** |
| Error          | 21 | 39.7682197  | 1.8937247<- |           |           |
| Total          | 35 | 1864.0875   |             |           |           |
| Model          | 14 | 1824.31928  | 130.30852   | 68.810697 | .0000 *** |

plant dry weight

| Source         | df | Type III SS | MS          | F         | P         |
|----------------|----|-------------|-------------|-----------|-----------|
| Blocks         | 3  | 17.59555114 | 5.8651837   | 8.6576968 | .0006 *** |
| Main Effects   |    |             |             |           |           |
| iinntttraction | 11 | 106.2704307 | 9.6609482   | 14.260689 | .0000 *** |
| Error          | 21 | 14.22651553 | 0.6774531<- |           |           |
| Total          | 35 | 140.1076972 |             |           |           |
| Model          | 14 | 125.8811817 | 8.991513    | 13.272524 | .0000 *** |

Phosphorus%

| Source         | df | Type III SS | MS          | F         | P         |
|----------------|----|-------------|-------------|-----------|-----------|
| Blocks         | 3  | 1.472348e-5 | 4.9078e-6   | 0.1305808 | .9408 ns  |
| Main Effects   |    |             |             |           |           |
| iinntttraction | 11 | 0.005147186 | 4.6793e-4   | 12.44994  | .0000 *** |
| Error          | 21 | 7.892765e-4 | 3.7585e-5<- |           |           |
| Total          | 35 | 0.00602675  |             |           |           |
| Model          | 14 | 0.005237473 | 3.7411e-4   | 9.9536855 | .0000 *** |

Potassium %

| Source         | df | Type III SS | MS         | F         | P         |
|----------------|----|-------------|------------|-----------|-----------|
| Blocks         | 3  | 0.018245076 | 0.0060817  | 1.0754546 | .3809 ns  |
| Main Effects   |    |             |            |           |           |
| iinntttraction | 11 | 0.967667045 | 0.0879697  | 15.556107 | .0000 *** |
| Error          | 21 | 0.118754924 | 0.005655<- |           |           |
| Total          | 35 | 1.108075    |            |           |           |
| Model          | 14 | 0.989320076 | 0.0706657  | 12.496156 | .0000 *** |

Calcium%

| Source         | df | Type III SS | MS          | F         | P         |
|----------------|----|-------------|-------------|-----------|-----------|
| Blocks         | 3  | 0.029222727 | 0.0097409   | 0.6681067 | .5810 ns  |
| Main Effects   |    |             |             |           |           |
| iinntttraction | 11 | 0.79829697  | 0.0725725   | 4.9775788 | .0008 *** |
| Error          | 21 | 0.306177273 | 0.0145799<- |           |           |
| Total          | 35 | 1.133075    |             |           |           |
| Model          | 14 | 0.826897727 | 0.0590641   | 4.0510734 | .0020 **  |

| Boron ppm      | df | Type III SS | MS          | F         | P         |
|----------------|----|-------------|-------------|-----------|-----------|
| Source         |    |             |             |           |           |
| Blocks         | 3  | 21.42450758 | 7.1415025   | 2.9699988 | .0552 ns  |
| Main Effects   |    |             |             |           |           |
| iinntttraction | 11 | 2289.052159 | 208.09565   | 86.54255  | .0000 *** |
| Error          | 21 | 50.49549242 | 2.4045473<- |           |           |
| Total          | 35 | 2375.4475   |             |           |           |
| Model          | 14 | 2324.952008 | 166.068     | 69.064145 | .0000 *** |

| Total Carbohydrates % | df | Type III SS | MS          | F         | P         |
|-----------------------|----|-------------|-------------|-----------|-----------|
| Source                |    |             |             |           |           |
| Blocks                | 3  | 10.88610758 | 3.6287025   | 2.606533  | .0786 ns  |
| Main Effects          |    |             |             |           |           |
| iinntttraction        | 11 | 238.0302545 | 21.639114   | 15.54359  | .0000 *** |
| Error                 | 21 | 29.23529242 | 1.3921568<- |           |           |
| Total                 | 35 | 276.867275  |             |           |           |
| Model                 | 14 | 247.6319826 | 17.687999   | 12.705465 | .0000 *** |

#### Exportable yield

| Source         | df | Type III SS | MS          | F         | P         |
|----------------|----|-------------|-------------|-----------|-----------|
| Blocks         | 3  | 0.319360227 | 0.1064534   | 6.5435051 | .0027 **  |
| Main Effects   |    |             |             |           |           |
| iinntttraction | 11 | 35.01684886 | 3.1833499   | 195.67496 | .0000 *** |
| Error          | 21 | 0.341639773 | 0.0162686<- |           |           |
| Total          | 35 | 36.912675   |             |           |           |
| Model          | 14 | 36.57103523 | 2.6122168   | 160.5684  | .0000 *** |

#### Total yield (g) /plan

| Source         | df | Type III SS | MS          | F         | P         |
|----------------|----|-------------|-------------|-----------|-----------|
| Blocks         | 3  | 710.4204545 | 236.80682   | 2.6457743 | .0756 ns  |
| Main Effects   |    |             |             |           |           |
| iinntttraction | 11 | 114712.9129 | 10428.447   | 116.51403 | .0000 *** |
| Error          | 21 | 1879.579545 | 89.503788<- |           |           |
| Total          | 35 | 126996.75   |             |           |           |
| Model          | 14 | 125117.1705 | 8936.9407   | 99.849861 | .0000 *** |

## Total yield

| Source         | df | Type III SS | MS          | F         | P         |
|----------------|----|-------------|-------------|-----------|-----------|
| Blocks         | 3  | 2.940721212 | 0.9802404   | 1.0581354 | .3879 ns  |
| Main Effects   |    |             |             |           |           |
| iinntttraction | 11 | 270.9449591 | 24.63136    | 26.588695 | .0000 *** |
| Error          | 21 | 19.45407879 | 0.9263847<- |           |           |
| Total          | 35 | 305.2411    |             |           |           |
| Model          | 14 | 285.7870212 | 20.413359   | 22.035509 | .0000 *** |

## Fruit length

| Source         | df | Type III SS | MS          | F         | P         |
|----------------|----|-------------|-------------|-----------|-----------|
| Blocks         | 3  | 0.184626894 | 0.0615423   | 5.0967087 | .0083 **  |
| Main Effects   |    |             |             |           |           |
| iinntttraction | 11 | 3.365457955 | 0.3059507   | 25.337723 | .0000 *** |
| Error          | 21 | 0.253573106 | 0.0120749<- |           |           |
| Total          | 35 | 3.844675    |             |           |           |
| Model          | 14 | 3.591101894 | 0.2565073   | 21.242997 | .0000 *** |

## Fruit diameter

| Source         | df | Type III SS | MS          | F         | P         |
|----------------|----|-------------|-------------|-----------|-----------|
| Blocks         | 3  | 0.107217803 | 0.0357393   | 9.5751925 | .0003 *** |
| Main Effects   |    |             |             |           |           |
| iinntttraction | 11 | 2.725700379 | 0.2477909   | 66.387649 | .0000 *** |
| Error          | 21 | 0.078382197 | 0.0037325<- |           |           |
| Total          | 35 | 2.9632      |             |           |           |
| Model          | 14 | 2.884817803 | 0.2060584   | 55.206754 | .0000 *** |

## Fruit weight

| Source         | df | Type III SS | MS          | F         | P         |
|----------------|----|-------------|-------------|-----------|-----------|
| Blocks         | 3  | 13.02666667 | 4.3422222   | 3.5435233 | .0321 *   |
| Main Effects   |    |             |             |           |           |
| iinntttraction | 11 | 357.5740909 | 32.506736   | 26.527517 | .0000 *** |
| Error          | 21 | 25.73333333 | 1.2253968<- |           |           |
| Total          | 35 | 395.85      |             |           |           |
| Model          | 14 | 370.1166667 | 26.436905   | 21.574158 | .0000 *** |

## Fruit firmness

| Source         | df | Type III SS | MS         | F         | P         |
|----------------|----|-------------|------------|-----------|-----------|
| Blocks         | 3  | 654.7234848 | 218.24116  | 6.9516573 | .0020 **  |
| Main Effects   |    |             |            |           |           |
| iinntttraction | 11 | 22116.54924 | 2010.5954  | 64.043694 | .0000 *** |
| Error          | 21 | 659.2765152 | 31.39412<- |           |           |
| Total          | 35 | 24422.75    |            |           |           |
| Model          | 14 | 23763.47348 | 1697.391   | 54.067162 | .0000 *** |

## TSS %

| Source         | df | Type III SS | MS          | F         | P         |
|----------------|----|-------------|-------------|-----------|-----------|
| Blocks         | 3  | 0.513939394 | 0.1713131   | 2.2682461 | .1102 ns  |
| Main Effects   |    |             |             |           |           |
| iinntttraction | 11 | 17.16560606 | 1.5605096   | 20.661696 | .0000 *** |
| Error          | 21 | 1.586060606 | 0.0755267<- |           |           |
| Total          | 35 | 18.92       |             |           |           |
| Model          | 14 | 17.33393939 | 1.2381385   | 16.393389 | .0000 *** |

## Total Acidity%

| Source         | df | Type III SS | MS          | F         | P         |
|----------------|----|-------------|-------------|-----------|-----------|
| Blocks         | 3  | 0.003345076 | 0.001115    | 1.3114326 | .2970 ns  |
| Main Effects   |    |             |             |           |           |
| iinntttraction | 11 | 0.134157955 | 0.0121962   | 14.344487 | .0000 *** |
| Error          | 21 | 0.017854924 | 8.5023e-4<- |           |           |
| Total          | 35 | 0.1649      |             |           |           |
| Model          | 14 | 0.147045076 | 0.0105032   | 12.353321 | .0000 *** |

## V. C (mg/100g)

| Source         | df | Type III SS | MS          | F         | P         |
|----------------|----|-------------|-------------|-----------|-----------|
| Blocks         | 3  | 10.54603485 | 3.5153449   | 1.804417  | .1773 ns  |
| Main Effects   |    |             |             |           |           |
| iinntttraction | 11 | 404.2431818 | 36.74938    | 18.863356 | .0000 *** |
| Error          | 21 | 40.91196515 | 1.9481888<- |           |           |
| Total          | 35 | 494.950475  |             |           |           |
| Model          | 14 | 454.0385098 | 32.431322   | 16.646909 | .0000 *** |

## Total sugars%

| Source         | df | Type III SS | MS          | F         | P         |
|----------------|----|-------------|-------------|-----------|-----------|
| Blocks         | 3  | 0.032440909 | 0.0108136   | 0.7441573 | .5377 ns  |
| Main Effects   |    |             |             |           |           |
| iinntttraction | 11 | 5.240781818 | 0.4764347   | 32.7866   | .0000 *** |
| Error          | 21 | 0.305159091 | 0.0145314<- |           |           |
| Total          | 35 | 5.6397      |             |           |           |
| Model          | 14 | 5.334540909 | 0.3810386   | 26.22177  | .0000 *** |

## Anthocyanin(mg/100g f.w

| Source         | df | Type III SS | MS          | F         | P         |
|----------------|----|-------------|-------------|-----------|-----------|
| Blocks         | 3  | 26.8117803  | 8.9372601   | 1.9467475 | .1530 ns  |
| Main Effects   |    |             |             |           |           |
| iinntttraction | 11 | 1307.882765 | 118.89843   | 25.898903 | .0000 *** |
| Error          | 21 | 96.4082197  | 4.5908676<- |           |           |
| Total          | 35 | 1426.3675   |             |           |           |
| Model          | 14 | 1329.95928  | 94.997091   | 20.692623 | .0000 *** |

# Season 2019

## Plant height

| Source         | df | Type III SS | MS          | F         | P         |
|----------------|----|-------------|-------------|-----------|-----------|
| Blocks         | 3  | 5.629090909 | 1.8763636   | 1.1159055 | .3650 ns  |
| Main Effects   |    |             |             |           |           |
| iinntttraction | 11 | 89.44787879 | 8.1316253   | 4.8360163 | .0010 *** |
| Error          | 21 | 35.31090909 | 1.6814719<- |           |           |
| Total          | 35 | 128.5675    |             |           |           |
| Model          | 14 | 93.25659091 | 6.6611851   | 3.9615204 | .0023 **  |

## No. of Crowns Broken

| Source         | df | Type III SS | MS          | F         | P         |
|----------------|----|-------------|-------------|-----------|-----------|
| Blocks         | 3  | 0.440871212 | 0.1469571   | 2.9698903 | .0552 ns  |
| Main Effects   |    |             |             |           |           |
| iinntttraction | 11 | 9.710037879 | 0.8827307   | 17.839314 | .0000 *** |
| Error          | 21 | 1.039128788 | 0.0494823<- |           |           |
| Total          | 35 | 11.19       |             |           |           |
| Model          | 14 | 10.15087121 | 0.7250622   | 14.652954 | .0000 *** |

## No. of leaves

| Source         | df | Type III SS | MS          | F         | P         |
|----------------|----|-------------|-------------|-----------|-----------|
| Blocks         | 3  | 9.197234848 | 3.0657449   | 2.0320399 | .1402 ns  |
| Main Effects   |    |             |             |           |           |
| iinntttraction | 11 | 168.7036742 | 15.336698   | 10.165484 | .0000 *** |
| Error          | 21 | 31.68276515 | 1.5087031<- |           |           |
| Total          | 35 | 210.1075    |             |           |           |
| Model          | 14 | 178.4247348 | 12.744624   | 8.4474035 | .0000 *** |

$R^2 = SS_{\text{model}}/SS_{\text{total}} = 0.84920688147$

Root MSerror =  $\sqrt{MS_{\text{error}}} = 1.22829275926$

## plant fresh weight

| Source         | df | Type III SS | MS          | F         | P         |
|----------------|----|-------------|-------------|-----------|-----------|
| Blocks         | 3  | 31.27875    | 10.42625    | 11.332147 | .0001 *** |
| Main Effects   |    |             |             |           |           |
| iinntttraction | 11 | 2797.170341 | 254.28821   | 276.38235 | .0000 *** |
| Error          | 21 | 19.32125    | 0.9200595<- |           |           |
| Total          | 35 | 2860.3675   |             |           |           |
| Model          | 14 | 2841.04625  | 202.93188   | 220.56385 | .0000 *** |

plant dry weight

| Source         | df | Type III SS | MS          | F         | P         |
|----------------|----|-------------|-------------|-----------|-----------|
| Blocks         | 3  | 12.51245455 | 4.1708182   | 4.177274  | .0182 *   |
| Main Effects   |    |             |             |           |           |
| iinntttraction | 11 | 139.6657091 | 12.696883   | 12.716535 | .0000 *** |
| Error          | 21 | 20.96754545 | 0.9984545<- |           |           |
| Total          | 35 | 169.5998    |             |           |           |
| Model          | 14 | 148.6322545 | 10.61659    | 10.633022 | .0000 *** |

Nitrogen %

| Source         | df | Type III SS | MS          | F         | P         |
|----------------|----|-------------|-------------|-----------|-----------|
| Blocks         | 3  | 0.030651136 | 0.010217    | 2.1553029 | .1236 ns  |
| Main Effects   |    |             |             |           |           |
| iinntttraction | 11 | 0.92990947  | 0.0845372   | 17.83327  | .0000 *** |
| Error          | 21 | 0.099548864 | 0.0047404<- |           |           |
| Total          | 35 | 1.0538      |             |           |           |
| Model          | 14 | 0.954251136 | 0.0681608   | 14.378634 | .0000 *** |

Phosphorus%

| Source         | df | Type III SS | MS          | F         | P         |
|----------------|----|-------------|-------------|-----------|-----------|
| Blocks         | 3  | 2.327235e-4 | 7.7574e-5   | 2.9337895 | .0571 ns  |
| Main Effects   |    |             |             |           |           |
| iinntttraction | 11 | 0.005861549 | 5.3287e-4   | 20.152537 | .0000 *** |
| Error          | 21 | 5.552765e-4 | 2.6442e-5<- |           |           |
| Total          | 35 | 0.006614    |             |           |           |
| Model          | 14 | 0.006058723 | 4.3277e-4   | 16.366774 | .0000 *** |

Potassium %

| Source         | df | Type III SS | MS          | F         | P         |
|----------------|----|-------------|-------------|-----------|-----------|
| Blocks         | 3  | 0.032708712 | 0.0109029   | 1.9520715 | .1522 ns  |
| Main Effects   |    |             |             |           |           |
| iinntttraction | 11 | 1.072039773 | 0.0974582   | 17.449049 | .0000 *** |
| Error          | 21 | 0.117291288 | 0.0055853<- |           |           |
| Total          | 35 | 1.2405      |             |           |           |
| Model          | 14 | 1.123208712 | 0.0802292   | 14.36435  | .0000 *** |



## Calcium%

| Source         | df | Type III SS | MS          | F         | P         |
|----------------|----|-------------|-------------|-----------|-----------|
| Blocks         | 3  | 0.035826894 | 0.0119423   | 1.5238714 | .2376 ns  |
| Main Effects   |    |             |             |           |           |
| iinntttraction | 11 | 1.09380947  | 0.0994372   | 12.688475 | .0000 *** |
| Error          | 21 | 0.164573106 | 0.0078368<- |           |           |
| Total          | 35 | 1.2869      |             |           |           |
| Model          | 14 | 1.122326894 | 0.0801662   | 10.229438 | .0000 *** |

.

## Boron ppm

| Source         | df | Type III SS | MS          | F         | P         |
|----------------|----|-------------|-------------|-----------|-----------|
| Blocks         | 3  | 34.49681818 | 11.498939   | 6.0104199 | .0040 **  |
| Main Effects   |    |             |             |           |           |
| iinntttraction | 11 | 2102.663636 | 191.15124   | 99.913495 | .0000 *** |
| Error          | 21 | 40.17651515 | 1.9131674<- |           |           |
| Total          | 35 | 2201.196389 |             |           |           |
| Model          | 14 | 2161.019874 | 154.35856   | 80.682204 | .0000 *** |

## Total Carbohydrates %

| Source         | df | Type III SS | MS          | F         | P         |
|----------------|----|-------------|-------------|-----------|-----------|
| Blocks         | 3  | 19.87902273 | 6.6263409   | 7.2238656 | .0016 **  |
| Main Effects   |    |             |             |           |           |
| iinntttraction | 11 | 263.241347  | 23.931032   | 26.088992 | .0000 *** |
| Error          | 21 | 19.26297727 | 0.9172846<- |           |           |
| Total          | 35 | 301.426875  |             |           |           |
| Model          | 14 | 282.1638977 | 20.154564   | 21.971985 | .0000 *** |

## Exportable yield

| Source         | df | Type III SS | MS          | F         | P         |
|----------------|----|-------------|-------------|-----------|-----------|
| Blocks         | 3  | 0.156726894 | 0.0522423   | 2.8024614 | .0649 ns  |
| Main Effects   |    |             |             |           |           |
| iinntttraction | 11 | 31.61643674 | 2.8742215   | 154.18339 | .0000 *** |
| Error          | 21 | 0.391473106 | 0.0186416<- |           |           |
| Total          | 35 | 34.2744     |             |           |           |
| Model          | 14 | 33.88292689 | 2.4202091   | 129.82856 | .0000 *** |

Total yield (g) /plan

| Source         | df | Type III SS | MS          | F         | P         |
|----------------|----|-------------|-------------|-----------|-----------|
| Blocks         | 3  | 530.3484848 | 176.78283   | 1.8059673 | .1770 ns  |
| Main Effects   |    |             |             |           |           |
| iinntttraction | 11 | 96519.69697 | 8774.5179   | 89.638188 | .0000 *** |
| Error          | 21 | 2055.651515 | 97.888167<- |           |           |
| Total          | 35 | 105299      |             |           |           |
| Model          | 14 | 103243.3485 | 7374.5249   | 75.336224 | .0000 *** |

Total yield

| Source         | df | Type III SS | MS          | F         | P         |
|----------------|----|-------------|-------------|-----------|-----------|
| Blocks         | 3  | 8.833501515 | 2.9445005   | 3.7083577 | .0276 *   |
| Main Effects   |    |             |             |           |           |
| iinntttraction | 11 | 266.8648848 | 24.260444   | 30.554046 | .0000 *** |
| Error          | 21 | 16.67436515 | 0.7940174<- |           |           |
| Total          | 35 | 304.4531639 |             |           |           |
| Model          | 14 | 287.7787987 | 20.555628   | 25.888134 | .0000 *** |

Fruit length

| Source         | df | Type III SS | MS         | F         | P         |
|----------------|----|-------------|------------|-----------|-----------|
| Blocks         | 3  | 0.024208712 | 0.0080696  | 0.7647457 | .5265 ns  |
| Main Effects   |    |             |            |           |           |
| iinntttraction | 11 | 3.056800379 | 0.2778909  | 26.335466 | .0000 *** |
| Error          | 21 | 0.221591288 | 0.010552<- |           |           |
| Total          | 35 | 3.343275    |            |           |           |
| Model          | 14 | 3.121683712 | 0.2229774  | 21.131361 | .0000 *** |

Fruit diameter

| Source         | df | Type III SS | MS          | F         | P         |
|----------------|----|-------------|-------------|-----------|-----------|
| Blocks         | 3  | 0.132872727 | 0.0442909   | 10.297101 | .0002 *** |
| Main Effects   |    |             |             |           |           |
| iinntttraction | 11 | 2.409177273 | 0.2190161   | 50.918602 | .0000 *** |
| Error          | 21 | 0.090327273 | 0.0043013<- |           |           |
| Total          | 35 | 2.6675      |             |           |           |
| Model          | 14 | 2.577172727 | 0.1840838   | 42.797252 | .0000 *** |

## Fruit firmness

| Source         | df | Type III SS | MS          | F         | P         |
|----------------|----|-------------|-------------|-----------|-----------|
| Blocks         | 3  | 795.7840909 | 265.26136   | 7.1214208 | .0018 **  |
| Main Effects   |    |             |             |           |           |
| iinntttraction | 11 | 22328.27652 | 2029.8433   | 54.494813 | .0000 *** |
| Error          | 21 | 782.2159091 | 37.248377<- |           |           |
| Total          | 35 | 25154.75    |             |           |           |
| Model          | 14 | 24372.53409 | 1740.8953   | 46.737481 | .0000 *** |
| TSS %          |    |             |             |           |           |

| Source         | df | Type III SS | MS          | F         | P        |
|----------------|----|-------------|-------------|-----------|----------|
| Blocks         | 3  | 607.9905682 | 202.66352   | 0.6953781 | .5652 ns |
| Main Effects   |    |             |             |           |          |
| iinntttraction | 11 | 3233.058523 | 293.91441   | 1.0084778 | .4717 ns |
| Error          | 21 | 6120.316098 | 291.44362<- |           |          |
| Total          | 35 | 9976.176389 |             |           |          |
| Model          | 14 | 3855.86029  | 275.41859   | 0.945015  | .5324 ns |

## Total Acidity%

| Source         | df | Type III SS | MS          | F         | P         |
|----------------|----|-------------|-------------|-----------|-----------|
| Blocks         | 3  | 0.003872727 | 0.0012909   | 0.8765432 | .4690 ns  |
| Main Effects   |    |             |             |           |           |
| iinntttraction | 11 | 0.114763636 | 0.0104331   | 7.0841751 | .0001 *** |
| Error          | 21 | 0.030927273 | 0.0014727<- |           |           |
| Total          | 35 | 0.1466      |             |           |           |
| Model          | 14 | 0.115672727 | 0.0082623   | 5.6102293 | .0002 *** |

## V. C (mg/100g

| Source         | df | Type III SS | MS          | F         | P         |
|----------------|----|-------------|-------------|-----------|-----------|
| Blocks         | 3  | 9.195980303 | 3.0653268   | 1.6520847 | .2077 ns  |
| Main Effects   |    |             |             |           |           |
| iinntttraction | 11 | 473.1117273 | 43.010157   | 23.180701 | .0000 *** |
| Error          | 21 | 38.9640197  | 1.8554295<- |           |           |
| Total          | 35 | 550.4953    |             |           |           |
| Model          | 14 | 511.5312803 | 36.537949   | 19.692448 | .0000 *** |

## Total sugars%

| Source         | df | Type III SS | MS        | F         | P         |
|----------------|----|-------------|-----------|-----------|-----------|
| Blocks         | 3  | 0.071137879 | 0.0237126 | 1.3317112 | .2908 ns  |
| Main Effects   |    |             |           |           |           |
| iinntttraction | 11 | 3.766872727 | 0.342443  | 19.231743 | .0000 *** |

|       |    |             |             |           |       |     |
|-------|----|-------------|-------------|-----------|-------|-----|
| Error | 21 | 0.373928788 | 0.0178061<- |           |       |     |
| ----- |    |             |             |           |       |     |
| Total | 35 | 4.247497222 |             |           |       |     |
| Model | 14 | 3.873568434 | 0.2766835   | 15.538661 | .0000 | *** |

Anthocyanin(mg/100g f.w

| Source         | df | Type III SS | MS          | F         | P     |     |
|----------------|----|-------------|-------------|-----------|-------|-----|
| -----          |    |             |             |           |       |     |
| Blocks         | 3  | 18.94450758 | 6.3148359   | 1.7103335 | .1955 | ns  |
| Main Effects   |    |             |             |           |       |     |
| iinntttraction | 11 | 970.5554924 | 88.232317   | 23.897168 | .0000 | *** |
| Error          | 21 | 77.53549242 | 3.6921663<- |           |       |     |
| -----          |    |             |             |           |       |     |
| Total          | 35 | 1070.4275   |             |           |       |     |
| Model          | 14 | 992.8920076 | 70.920858   | 19.208468 | .0000 | *** |
